# Supplementary material
Source: Springer Nature journal article supplement (https://www.springermedizin.de/resource/supplementary/12889_2006_434_MOESM2_ESM.pdf/9500858)

### "Avoidable" causes

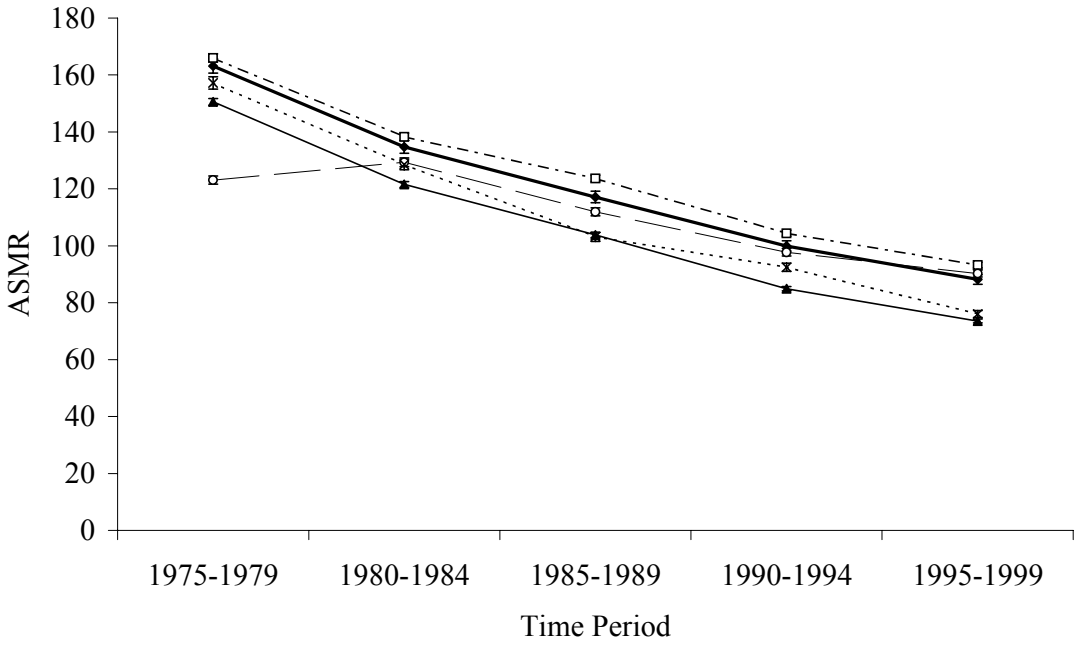

### Other Causes

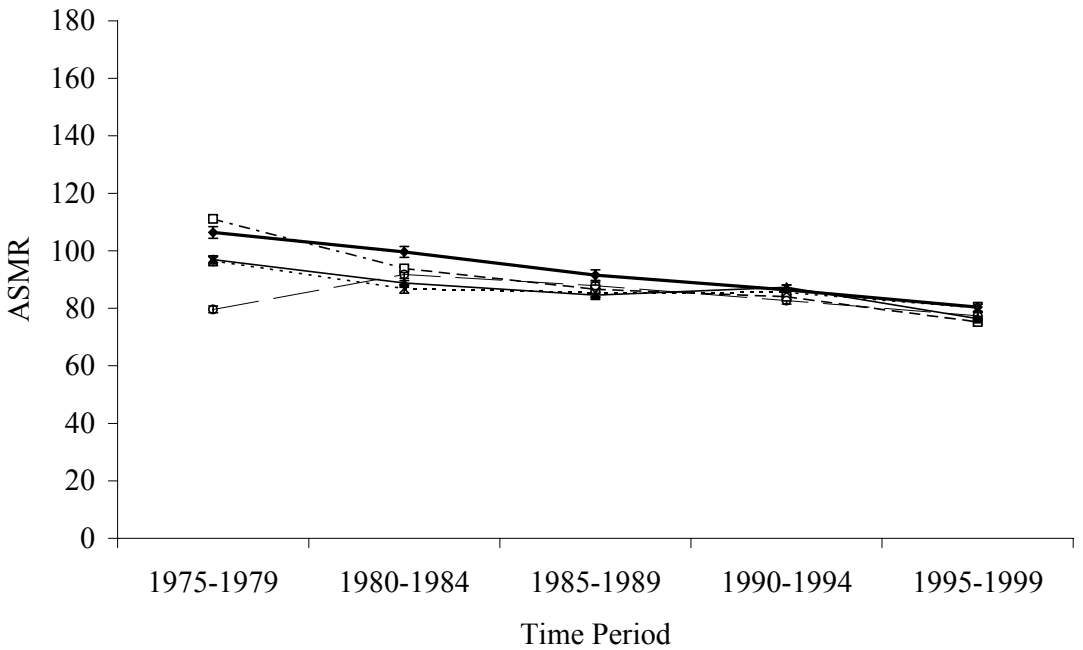

Supplement: MOESM2 [file 9500858]
